# Supplementary material for: Forearm Range of Motion in Australovenator wintonensis (Theropoda, Megaraptoridae)
Source: PubMed Central journal article supplement (PMC4569425; doi:10.1371/journal.pone.0137709), 2015-09-14
Supplement: pone.0137709.s001.pdf [file pone.0137709.s001.pdf]

*Australovenator wintonensis* Supplementary Figure 1 Right Humerus

*Australovenator* specimens were discovered by and are housed in The Australian Age of Dinosaurs Museum of Natural History. Access to the specimens was granted by founder and chairman David A. Elliott. Computed tomography (CT) scanning: Sarah J. Wooldridge (Queensland Xray Mackay). Model construction: Matt A. White (University of Newcastle). Visualisation: David G. Barnes (Monash University).
